# Supplementary material for: Novel extensions to the Fisher copula to model flood spatial dependence over North America
Source: Copernicus journal article supplement (doi:10.5194/egusphere-2024-442), 2024-02-21
Supplement: Supplementary file 1 [file egusphere-2024-442-supplement.pdf]

## Supplementary information: Novel extensions to the Fisher copula to model flood spatial dependence over North America

Table S1: Catchment attribute description (130 attributes)

|    | <i>Covariates</i>                                                                                                                          | <i>Description</i>                                                      |
|----|--------------------------------------------------------------------------------------------------------------------------------------------|-------------------------------------------------------------------------|
| 1  | catch_lat                                                                                                                                  | Unit catchment centroid latitude                                        |
| 2  | catch_lon                                                                                                                                  | Unit catchment centroid longitude                                       |
| 3  | centroid_lat                                                                                                                               | Latitude of centroid of upstream area                                   |
| 4  | centroid_lon                                                                                                                               | Longitude of centroid of upstream area                                  |
| 5  | SLPmean                                                                                                                                    | River slope mean                                                        |
| 6  | River_slope                                                                                                                                | River slope                                                             |
| 7  | log_drainage_area                                                                                                                          | log10 of upstream drainage area                                         |
| 8  | log_drainage_length                                                                                                                        | log10 of sum of upstream drainage length                                |
| 9  | log_river_length                                                                                                                           | log10 of length of drainage from station to Network outlet              |
| 10 | log_dam_area                                                                                                                               | log10 of sum of upstream area protected by dams based on GOODDS dataset |
| 11 | RD                                                                                                                                         | River Depth                                                             |
|    | Source: <a href="http://u-tokyo.ac.jp">MERIT DEM: Multi-Error-Removed Improved-Terrain DEM (u-tokyo.ac.jp)</a>                             |                                                                         |
| 12 | Dmean                                                                                                                                      | Mean DEM value                                                          |
| 13 | Dmin                                                                                                                                       | Minimum DEM value                                                       |
| 14 | Dmax                                                                                                                                       | Maximum DEM value                                                       |
| 15 | FDR0                                                                                                                                       | Fractional coverage of flow direction classes – Flat area               |
| 16 | FDR1                                                                                                                                       | Fractional coverage of flow direction classes – East (90°)              |
| 17 | FDR2                                                                                                                                       | Fractional coverage of flow direction classes – Southeast (135°)        |
| 18 | FDR4                                                                                                                                       | Fractional coverage of flow direction classes – South (180°)            |
| 19 | FDR8                                                                                                                                       | Fractional coverage of flow direction classes – Southwest (225°)        |
| 20 | FDR16                                                                                                                                      | Fractional coverage of flow direction classes – West (270°)             |
| 21 | FDR32                                                                                                                                      | Fractional coverage of flow direction classes – Northwest (315°)        |
| 22 | FDR64                                                                                                                                      | Fractional coverage of flow direction classes – North (0°)              |
| 23 | FDR128                                                                                                                                     | Fractional coverage of flow direction classes – Northeast (45°)         |
|    | Source: <a href="http://bnu.edu.cn">Land-Atmosphere Interaction Research Group at Sun Yat-sen University (bnu.edu.cn)</a> – 30s resolution |                                                                         |
| 24 | BS45                                                                                                                                       | Mean base saturation at 45mm                                            |
| 25 | BS91                                                                                                                                       | Mean base saturation at 91mm                                            |
| 26 | BS166                                                                                                                                      | Mean base saturation at 166mm                                           |
| 27 | BS289                                                                                                                                      | Mean base saturation at 289mm                                           |
| 28 | BS493                                                                                                                                      | Mean base saturation at 493mm                                           |
| 29 | BS829                                                                                                                                      | Mean base saturation at 829mm                                           |
| 30 | BS1383                                                                                                                                     | Mean base saturation at 1383mm                                          |
| 31 | BS2296                                                                                                                                     | Mean base saturation at 2296mm                                          |
| 32 | BD45                                                                                                                                       | Mean bulk density at 45mm                                               |
| 33 | BD91                                                                                                                                       | Mean bulk density at 91mm                                               |
| 34 | BD166                                                                                                                                      | Mean bulk density at 166mm                                              |
| 35 | BD289                                                                                                                                      | Mean bulk density at 289mm                                              |
| 36 | BD493                                                                                                                                      | Mean bulk density at 493mm                                              |
| 37 | BD829                                                                                                                                      | Mean bulk density at 829mm                                              |
| 38 | BD1383                                                                                                                                     | Mean bulk density at 1383mm                                             |
| 39 | BD2296                                                                                                                                     | Mean bulk density at 2296mm                                             |
| 40 | CLAY45                                                                                                                                     | Mean clay fraction at 45mm                                              |

|    |            |                                           |
|----|------------|-------------------------------------------|
| 41 | CLAY91     | Mean clay fraction at 91mm                |
| 42 | CLAY166    | Mean clay fraction at 166mm               |
| 43 | CLAY289    | Mean clay fraction at 289mm               |
| 44 | CLAY493    | Mean clay fraction at 493mm               |
| 45 | CLAY829    | Mean clay fraction at 829mm               |
| 46 | CLAY1383   | Mean clay fraction at 1383mm              |
| 47 | CLAY2296   | Mean clay fraction at 2296mm              |
| 48 | GRAV45     | Mean gravel fraction at 45mm              |
| 49 | GRAV91     | Mean gravel fraction at 91mm              |
| 50 | GRAV166    | Mean gravel fraction at 166mm             |
| 51 | GRAV289    | Mean gravel fraction at 289mm             |
| 52 | GRAV493    | Mean gravel fraction at 493mm             |
| 53 | GRAV829    | Mean gravel fraction at 829mm             |
| 54 | GRAV1383   | Mean gravel fraction at 1383mm            |
| 55 | GRAV2296   | Mean gravel fraction at 2296mm            |
| 56 | SAND45     | Mean sand fraction at 45mm                |
| 57 | SAND91     | Mean sand fraction at 91mm                |
| 58 | SAND166    | Mean sand fraction at 166mm               |
| 59 | SAND289    | Mean sand fraction at 289mm               |
| 60 | SAND493    | Mean sand fraction at 493mm               |
| 61 | SAND829    | Mean sand fraction at 829mm               |
| 62 | SAND1383   | Mean sand fraction at 1383mm              |
| 63 | SAND2296   | Mean sand fraction at 2296mm              |
| 64 | SILT45     | Mean silt fraction at 45mm                |
| 65 | SILT91     | Mean silt fraction at 91mm                |
| 66 | SILT166    | Mean silt fraction at 166mm               |
| 67 | SILT289    | Mean silt fraction at 289mm               |
| 68 | SILT493    | Mean silt fraction at 493mm               |
| 69 | SILT829    | Mean silt fraction at 829mm               |
| 70 | SILT1383   | Mean silt fraction at 1383mm              |
| 71 | SILT2296   | Mean silt fraction at 2296mm              |
| 72 | AWC_5      | Available Water Capacity in mm/m 50 mm/m  |
| 73 | AWC_4      | Available Water Capacity in mm/m 75 mm/m  |
| 74 | AWC_1      | Available Water Capacity in mm/m 150 mm/m |
| 75 | AWC_3      | Available Water Capacity in mm/m 100 mm/m |
| 76 | AWC_2      | Available Water Capacity in mm/m 125 mm/m |
| 77 | AWC_6      | Available Water Capacity in mm/m 15 mm/m  |
| 78 | DRAINAGE_1 | Surface soil drainage classes             |
| 79 | DRAINAGE_2 | Surface soil drainage classes             |
| 80 | DRAINAGE_3 | Surface soil drainage classes             |
| 81 | DRAINAGE_4 | Surface soil drainage classes             |
| 82 | DRAINAGE_5 | Surface soil drainage classes             |
| 83 | DRAINAGE_6 | Surface soil drainage classes             |
| 84 | OC45       | Mean Organic Carbon fraction at 45mm      |
| 85 | OC91       | Mean Organic Carbon fraction at 91mm      |
| 86 | OC166      | Mean Organic Carbon fraction at 166mm     |
| 87 | OC289      | Mean Organic Carbon fraction at 289mm     |
| 88 | OC493      | Mean Organic Carbon fraction at 493mm     |
| 89 | OC829      | Mean Organic Carbon fraction at 829mm     |
| 90 | OC1383     | Mean Organic Carbon fraction at 1383mm    |

|     |                                                                                                                                                                |                                                            |
|-----|----------------------------------------------------------------------------------------------------------------------------------------------------------------|------------------------------------------------------------|
| 91  | OC2296                                                                                                                                                         | Mean Organic Carbon fraction at 2296mm                     |
| 92  | TEXTURE_1                                                                                                                                                      | Surface soil texture classes                               |
| 93  | TEXTURE_2                                                                                                                                                      | Surface soil texture classes                               |
| 94  | TEXTURE_3                                                                                                                                                      | Surface soil texture classes                               |
| 95  | TEXTURE_4                                                                                                                                                      | Surface soil texture classes                               |
|     | Source: Copernicus, <a href="https://land.copernicus.eu/product-user-manual/land-cover-100m-v2.0">Product User Manual Land Cover 100m V2.0 (copernicus.eu)</a> |                                                            |
| 96  | LULC1                                                                                                                                                          | Permanent water bodies                                     |
| 97  | LULC2                                                                                                                                                          | open/closed forest                                         |
| 98  | LULC3                                                                                                                                                          | Herbaceous vegetation, Moss and lichen                     |
| 99  | LULC4                                                                                                                                                          | Herbaceous wetland                                         |
| 100 | LULC5                                                                                                                                                          | Cultivated and managed vegetation/agriculture (cropland)   |
| 101 | LULC6                                                                                                                                                          | Shrubs                                                     |
| 102 | LULC7                                                                                                                                                          | Urban / built up                                           |
| 103 | LULC8                                                                                                                                                          | Bare / sparse vegetation                                   |
| 104 | LULC9                                                                                                                                                          | Snow and Ice                                               |
| 105 | LULC10                                                                                                                                                         | Open/Closed forest, evergreen needle leaf                  |
| 106 | LULC11                                                                                                                                                         | Open/Closed forest, evergreen, broad leaf                  |
| 107 | LULC12                                                                                                                                                         | Open/Closed forest, deciduous needle leaf                  |
| 108 | LULC13                                                                                                                                                         | Open/Closed forest, deciduous broad leaf                   |
|     | Source: <a href="#">Historical climate data — WorldClim 1 documentation</a> – 30s resolution                                                                   |                                                            |
| 109 | Srad                                                                                                                                                           | Upstream mean solar radiation from 1970 to 2000            |
| 110 | Vapr                                                                                                                                                           | Upstream mean vapor pressure from 1970 to 2000             |
| 111 | Wind                                                                                                                                                           | Upstream mean windspeed from 1970 to 2000                  |
| 112 | mean.BIOC_1                                                                                                                                                    | Annual Mean Temperature                                    |
| 113 | mean.BIOC_2                                                                                                                                                    | Mean Diurnal Range (Mean of monthly (max temp - min temp)) |
| 114 | mean.BIOC_3                                                                                                                                                    | Isothermality (BIO2/BIO7) (×100)                           |
| 115 | mean.BIOC_4                                                                                                                                                    | Temperature Seasonality (standard deviation ×100)          |
| 116 | mean.BIOC_5                                                                                                                                                    | Max Temperature of Warmest Month                           |
| 117 | mean.BIOC_6                                                                                                                                                    | Min Temperature of Coldest Month                           |
| 118 | mean.BIOC_7                                                                                                                                                    | Temperature Annual Range (BIO5-BIO6)                       |
| 119 | mean.BIOC_8                                                                                                                                                    | Mean Temperature of Wettest Quarter                        |
| 120 | mean.BIOC_9                                                                                                                                                    | Mean Temperature of Driest Quarter                         |
| 121 | mean.BIOC_10                                                                                                                                                   | Mean Temperature of Warmest Quarter                        |
| 122 | mean.BIOC_11                                                                                                                                                   | Mean Temperature of Coldest Quarter                        |
| 123 | mean.BIOC_12                                                                                                                                                   | Annual Precipitation                                       |
| 124 | mean.BIOC_13                                                                                                                                                   | Precipitation of Wettest Month                             |
| 125 | mean.BIOC_14                                                                                                                                                   | Precipitation of Driest Month                              |
| 126 | mean.BIOC_15                                                                                                                                                   | Precipitation Seasonality (Coefficient of Variation)       |
| 127 | mean.BIOC_16                                                                                                                                                   | Precipitation of Wettest Quarter                           |
| 128 | mean.BIOC_17                                                                                                                                                   | Precipitation of Driest Quarter                            |
| 129 | mean.BIOC_18                                                                                                                                                   | Precipitation of Warmest Quarter                           |
| 130 | mean.BIOC_19                                                                                                                                                   | Precipitation of Coldest Quarter                           |

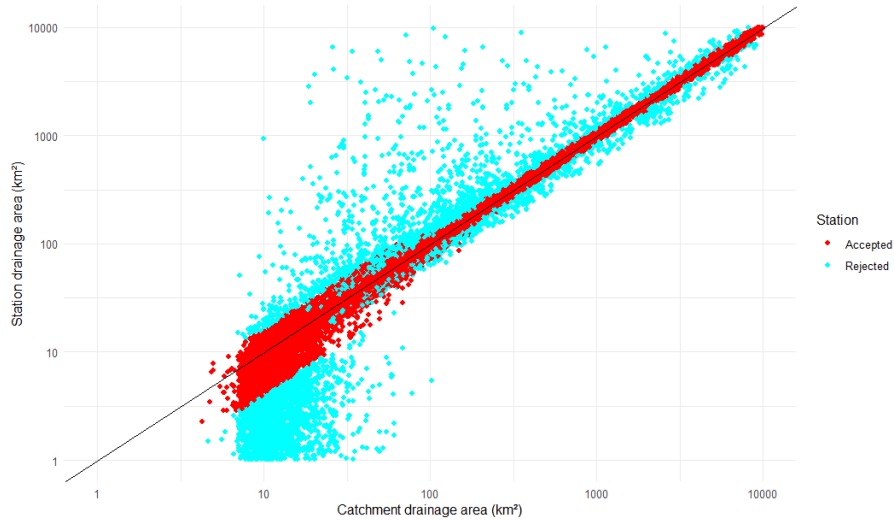

Figure S2: Catchment cumulative upstream drainage area and station drainage area comparison, calculated for a total of 43941 stations. Among these stations, 37336 met the specified criterion (maximum of either 15% of the upstream catchment drainage area or 60% of the catchment unit area) and were accepted, while 6605 stations were rejected.

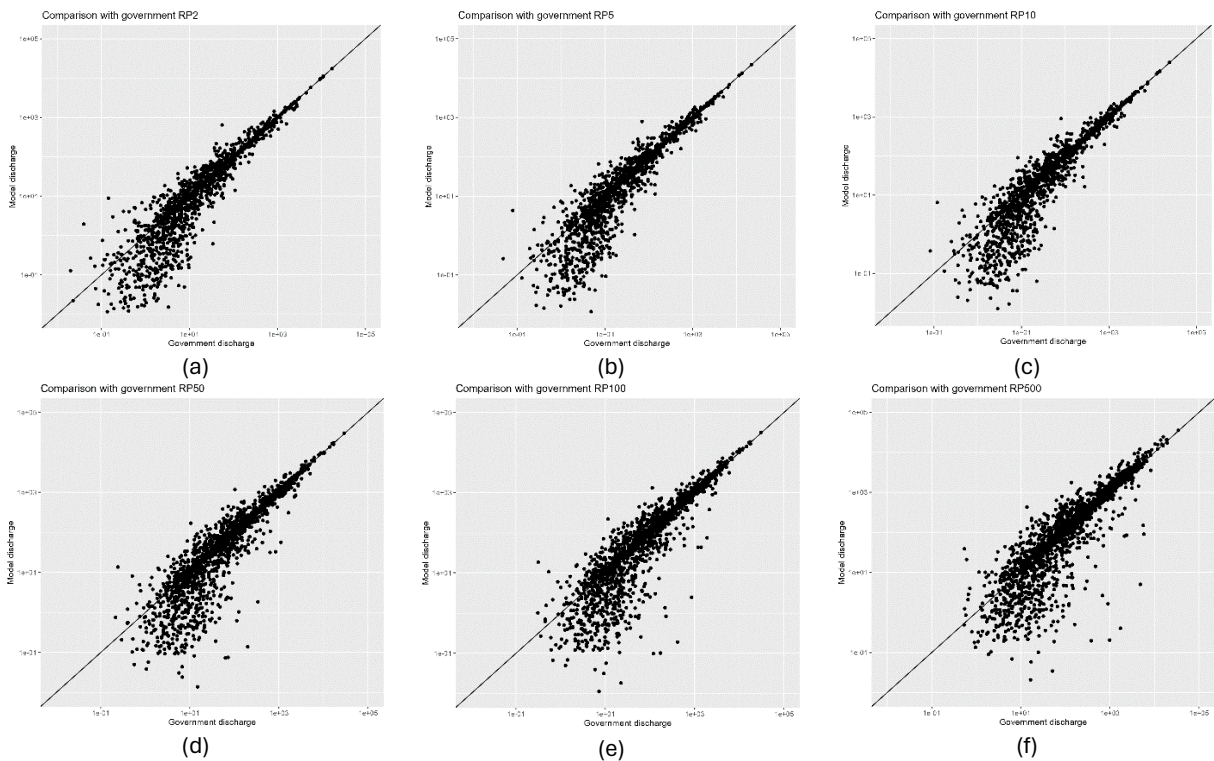

Figure S3: Comparison of the discharge return levels calculated with the marginal model (section 4.3.2, manuscript) (y-axis) and the return levels from government sources<sup>(1,2)</sup> (x-axis), for return periods 2, 5, 10, 50, 100, 500 years (a-f respectively) and for region 9 (British Columbia).

- (1) U.S. Geological Survey: National Water Information System data, <https://waterdata.usgs.gov/nwis>, 2016
- (2) Atlas hydroclimatique, <https://www.donneesquebec.ca/recherche/dataset/atlas-hydroclimatique-2022>, 2022.

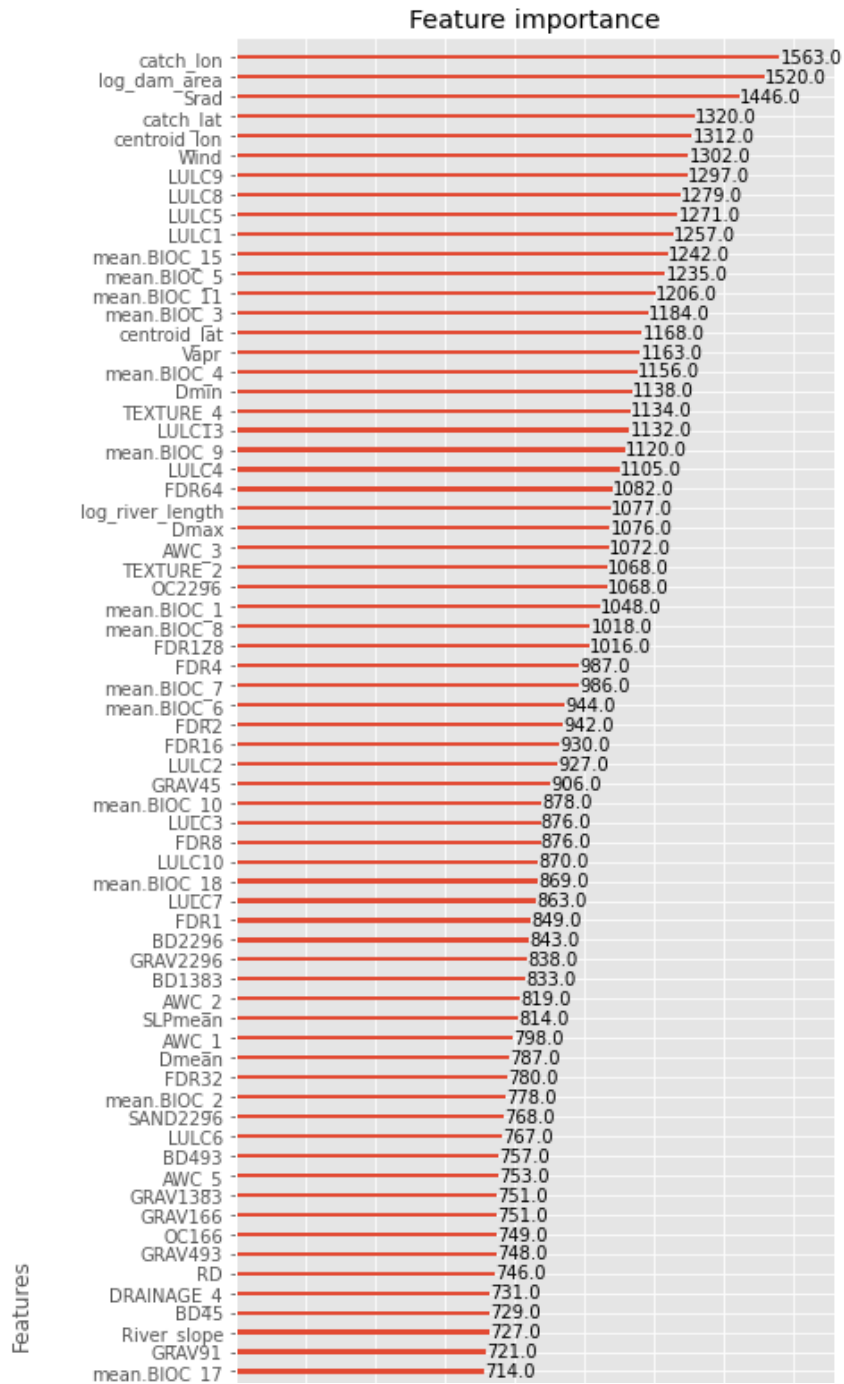

Figure S4: Feature importance for the XGBoost tau interpolation model applied to region 9, with importance decreasing from top to bottom.

**Spatial flood analysis for regions 7 (St Lawrence), 8 (Prairie), 10 (East coast) and 11 (Midwest)**

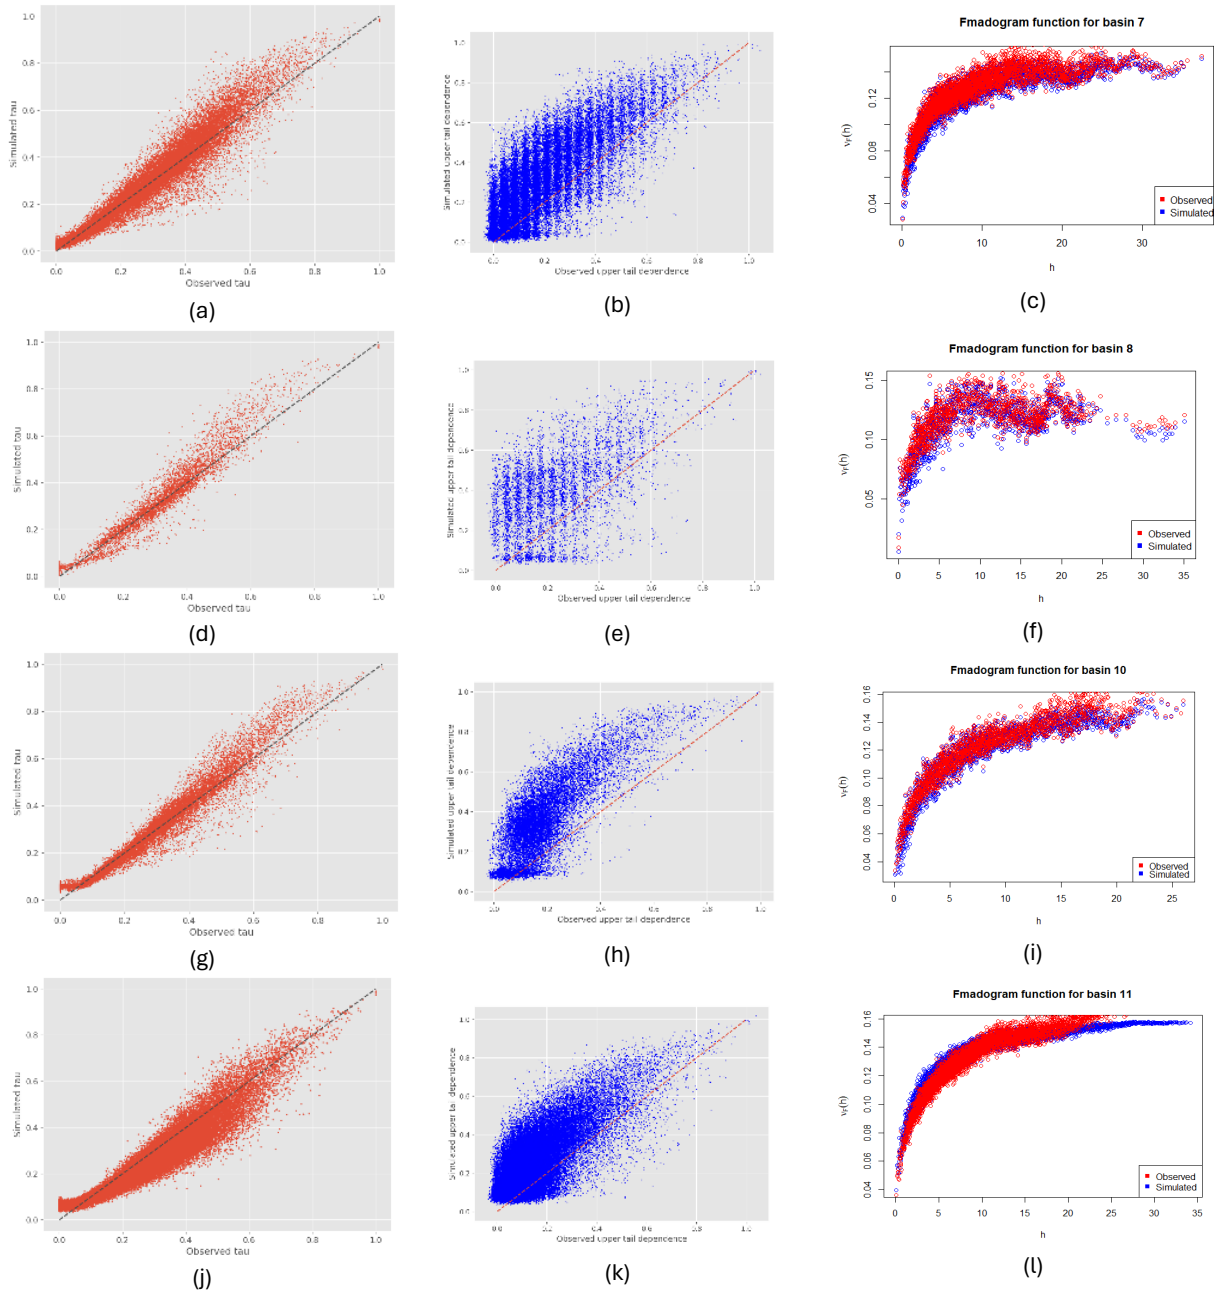

Figure S5: Validation of the Fisher copula model by comparing pairwise Kendall's taus, upper tail dependence and F-madogram for region 7 (a-c), 8 (d-f), 10 (g-i) and 11 (j-l).

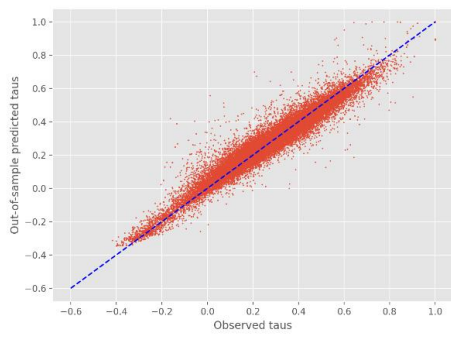

(a)

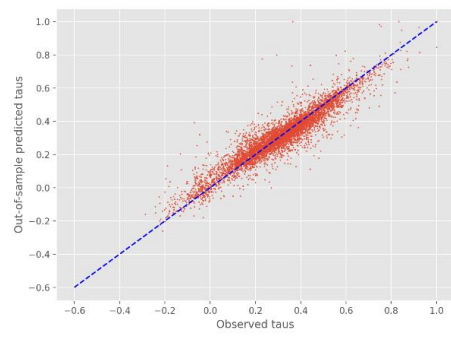

(b)

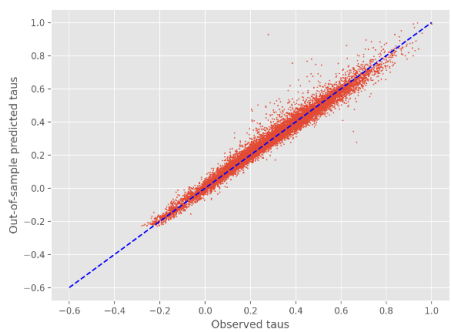

(c)

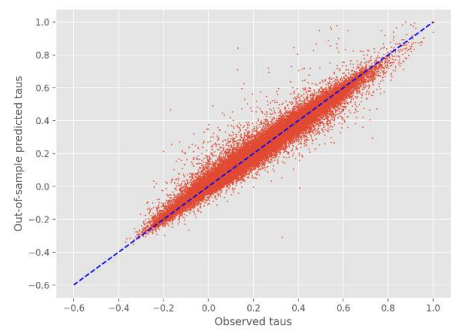

(d)

Figure S6: XGBoost tau interpolation model cross-validation results for regions 7, 8, 10 and 11 respectively (a-d). Out-of-sample Kendall's tau predictions are compared with the true values using 10-fold cross validation.

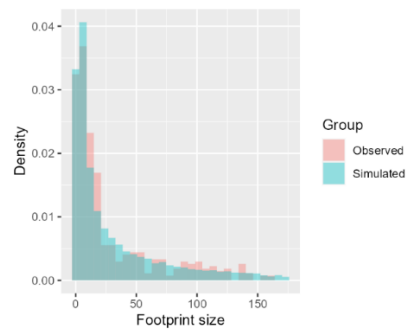

(a)

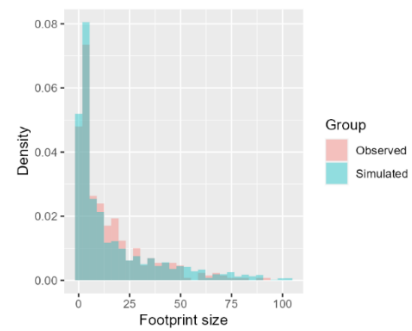

(b)

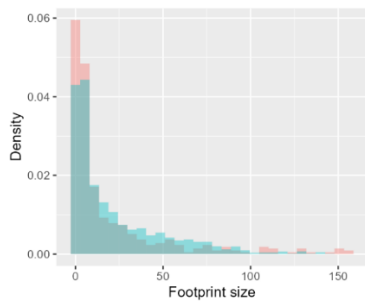

(c)

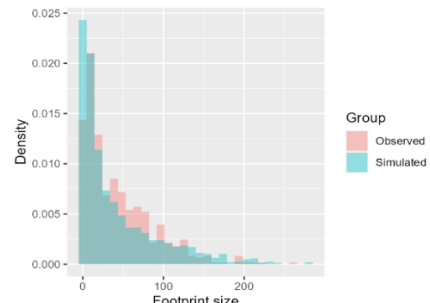

(d)

Figure S7: Histogram of event footprint sizes, defined as the number of gauges with a flow greater than the 0.9th quantile flow, for observed and simulated events, for region 7 (a), 8 (b), 10 (c) and 11 (d)



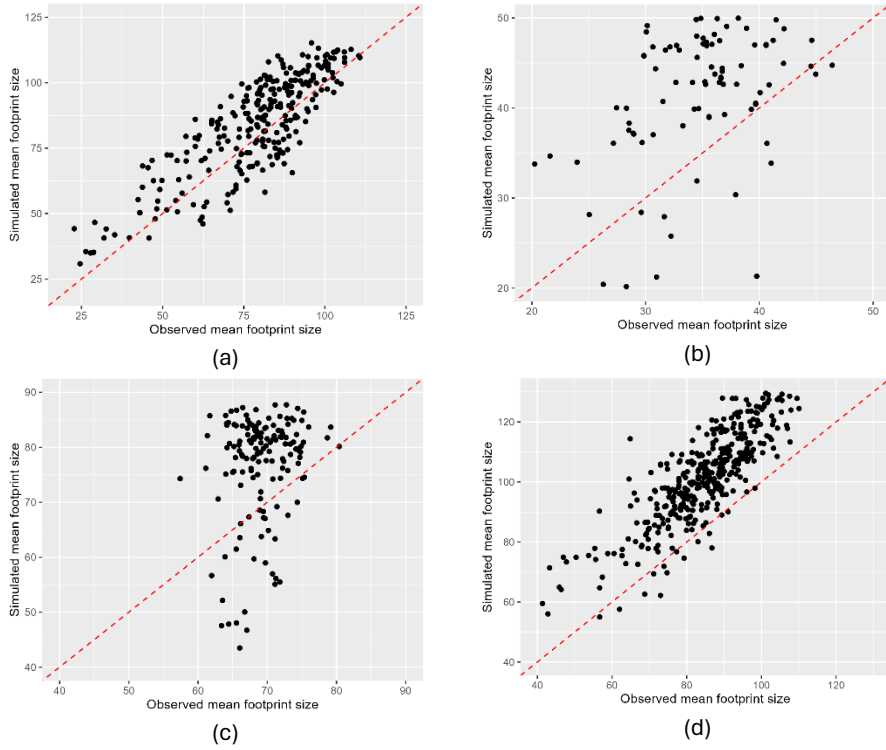

Figure S8: Mean event footprint size for the observed and simulated events at each gauged station, for region 7 (a), 8 (b), 10 (c) and 11 (d). The means are calculated over all events impacting each gauge with a flow greater than the 0.9th quantile flow.

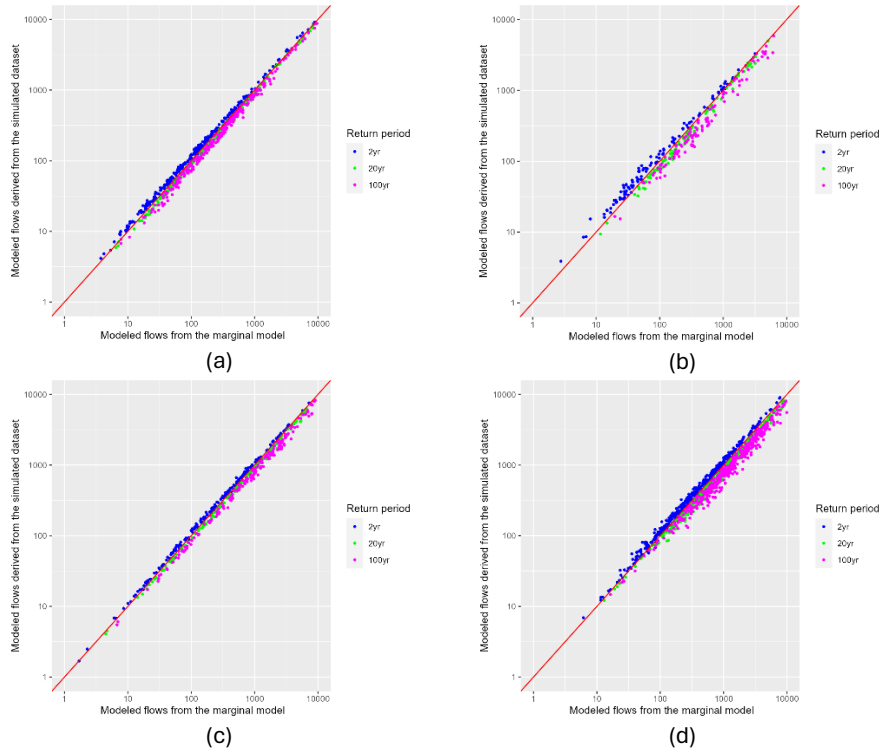

Figure S9: Discharge levels with return period 2 (blue), 20 (green) and 100 years (magenta) for all gauged stations, estimated from the synthetic event set and compared with the same quantities from the marginal model in section 4.3.2, for regions 7 (a), 8 (b), 10 (c) and 11 (d).



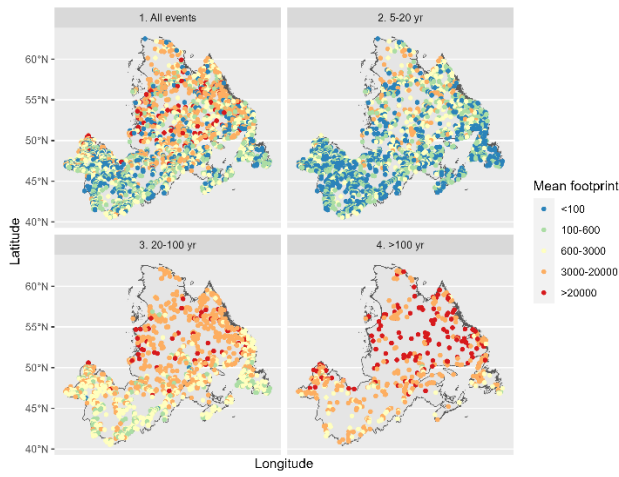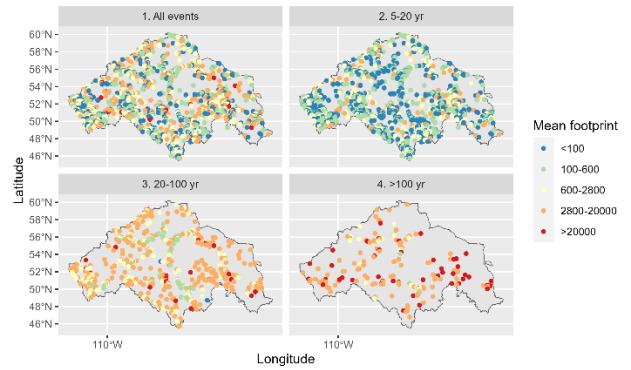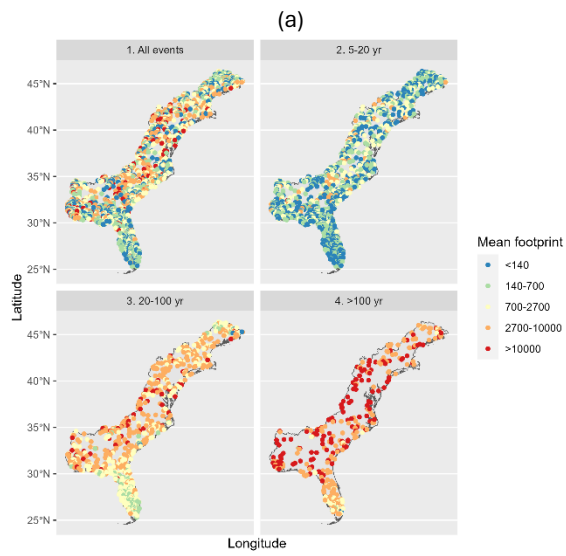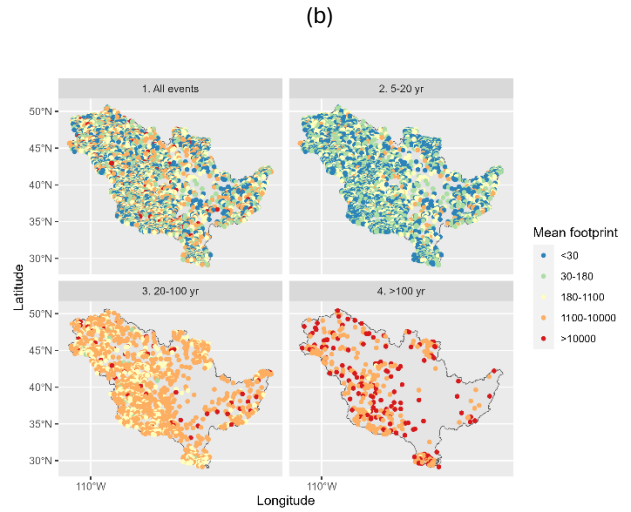

Figure S10: Mean event footprint size for catchments experiencing events with peak magnitude within one of four categories (> 5 (all events), 5-20, 20-100 and >100 year magnitudes), for region 7 (a), 8 (b), 10 (c) and 11 (d).

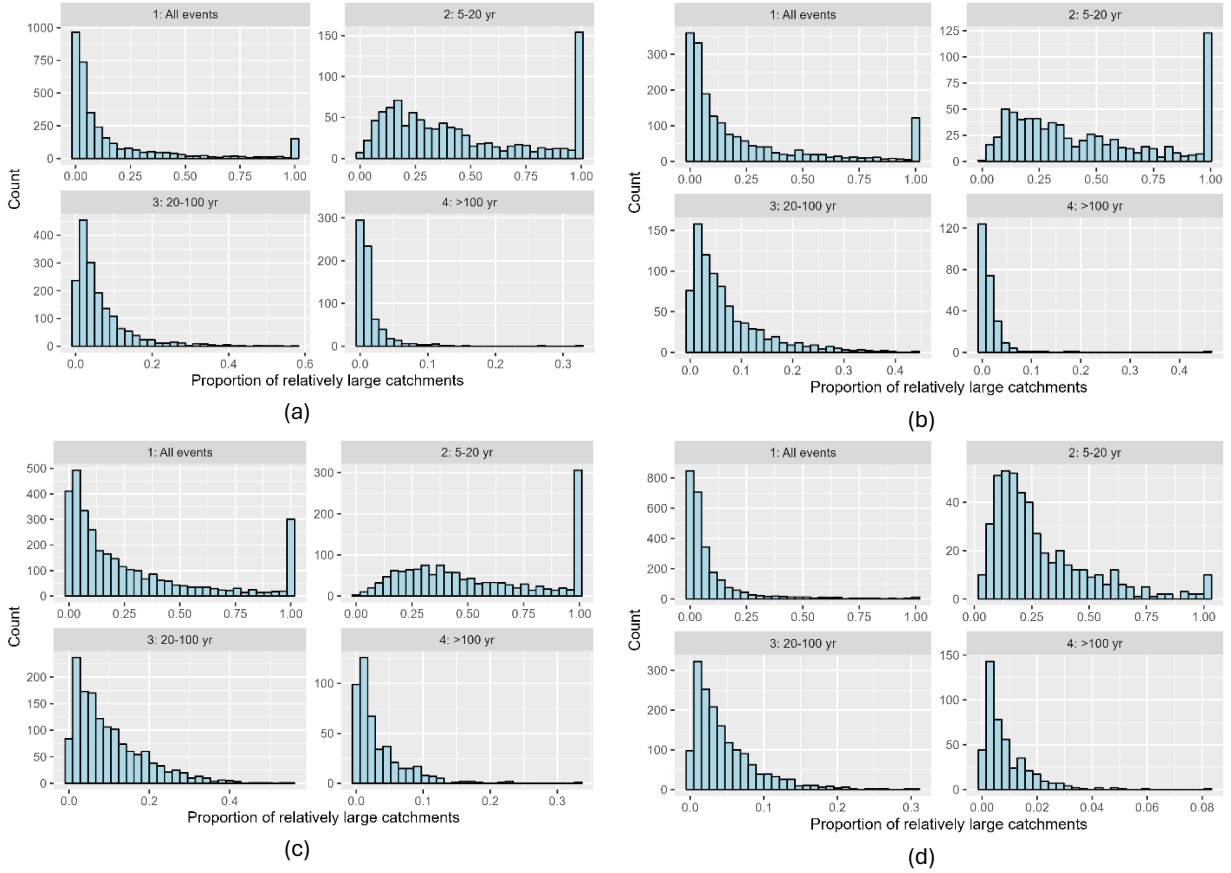

Figure S11: Histograms of the proportion of catchments in a given event with flow return period at least half the maximum event flow return period. The events are divided into four categories of magnitude: greater than 5, 5 to 20, 20 to 100 and greater than 100-year return period ranges. This is shown for region 7 (a), 8 (b), 10 (c) and 11 (d).
